# Supplementary material for: Depletion of tumor‐associated macrophages inhibits lung cancer growth and enhances the antitumor effect of cisplatin
Source: PubMed Central journal article supplement — Cancer Sci. 2022 Dec 28;114(3):750–63. doi: 10.1111/cas.15671 (PMC9986097; doi:10.1111/cas.15671), 2022-12-28
Supplement: CAS-114-750-s001.pdf [file CAS-114-750-s001.pdf]

**A****THP-1 Migration assay**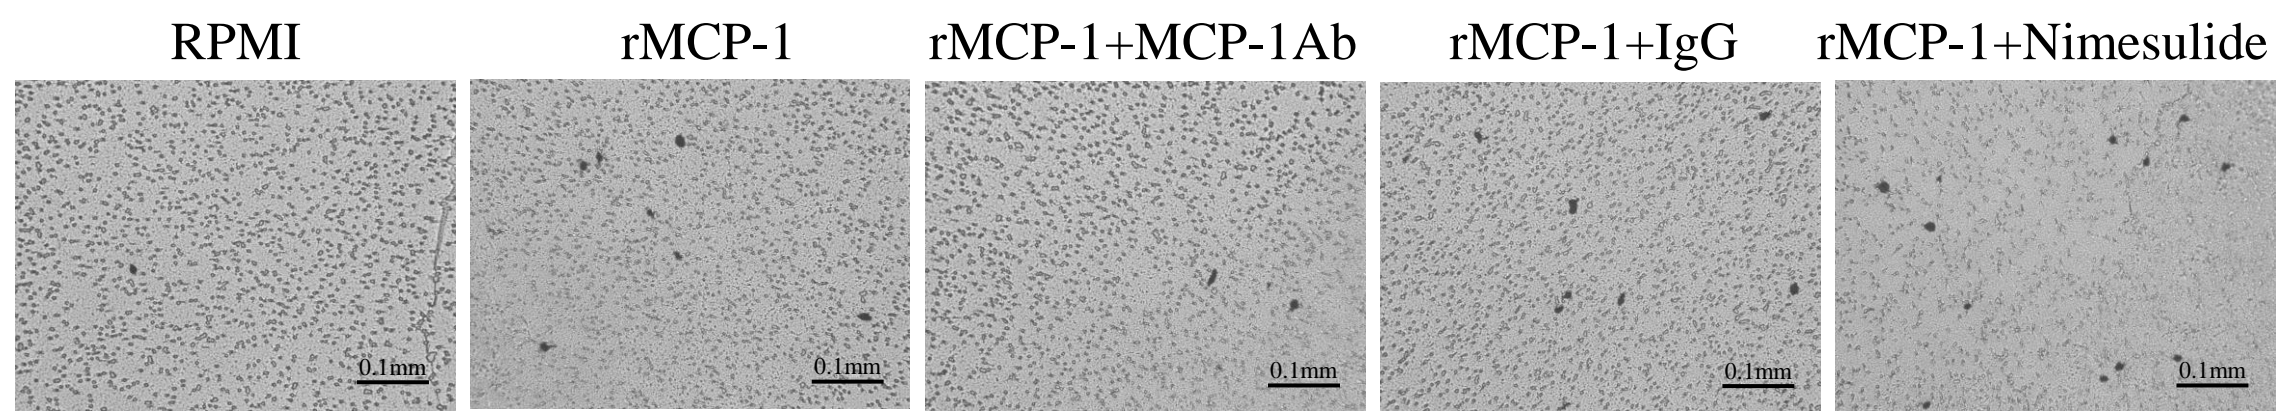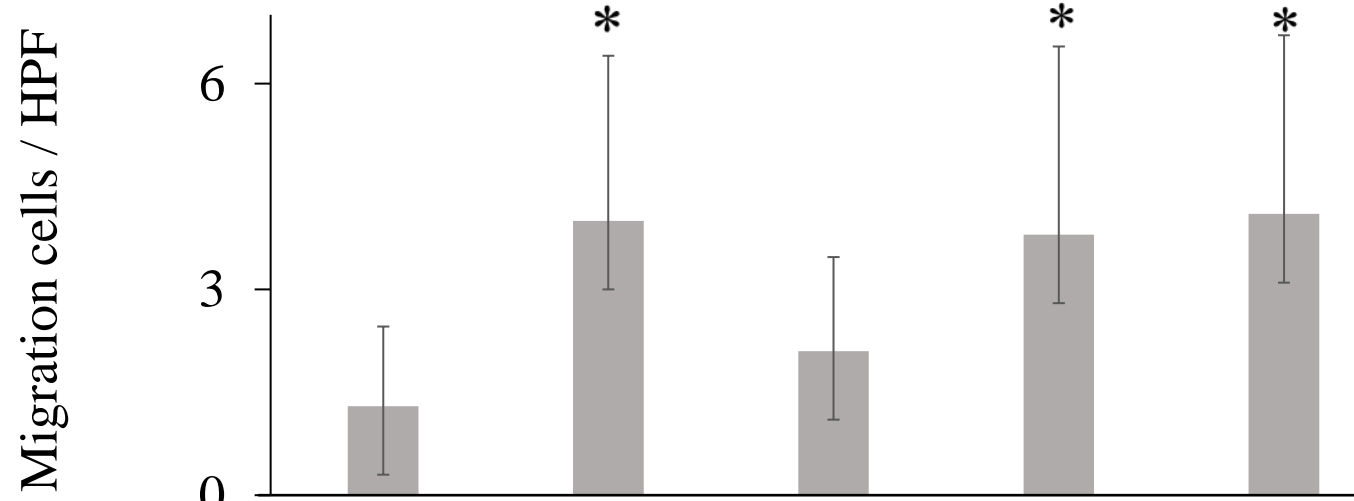

|                          |   |   |   |   |   |
|--------------------------|---|---|---|---|---|
| RPMI                     | + | + | + | + | + |
| Nimesulide (100 $\mu$ M) | - | - | - | - | + |
| rMCP-1 (1ng/ml)          | - | + | + | + | + |
| MCP-1Ab (100ng/ml)       | - | - | + | - | - |
| IgG control (100ng/ml)   | - | - | - | + | - |

**B****J774-1 Migration assay**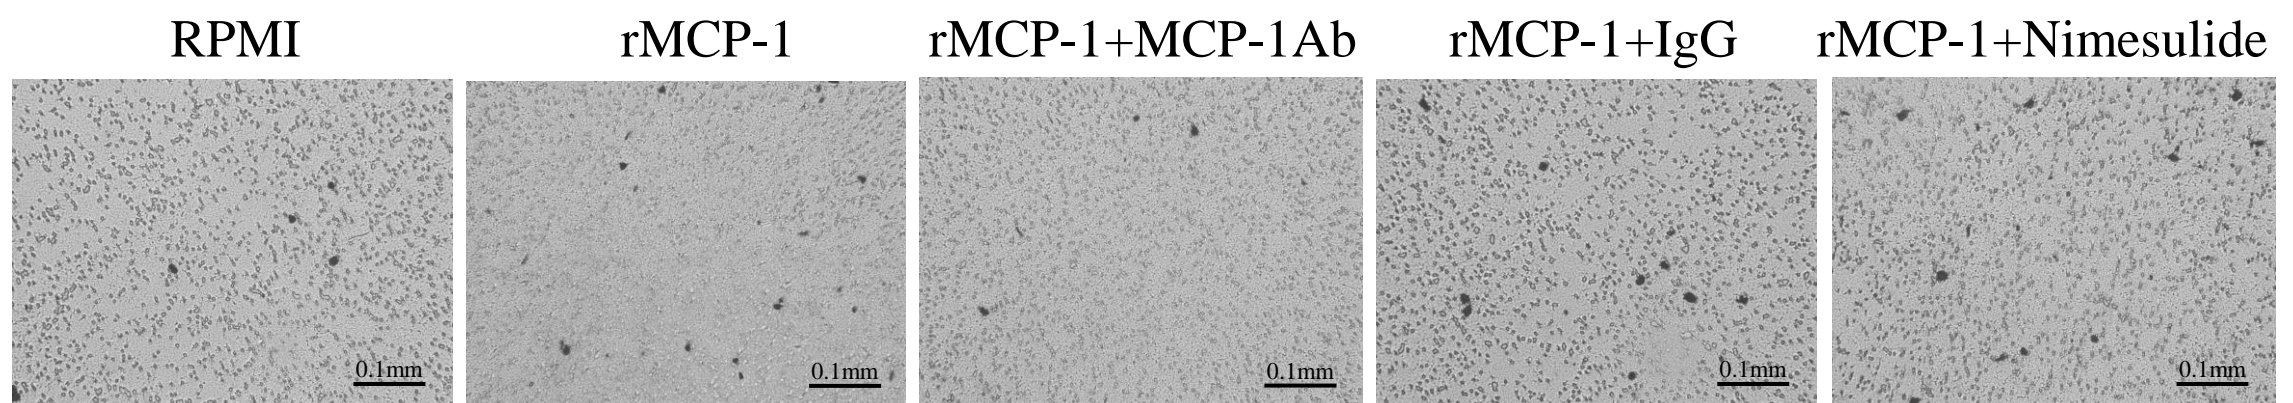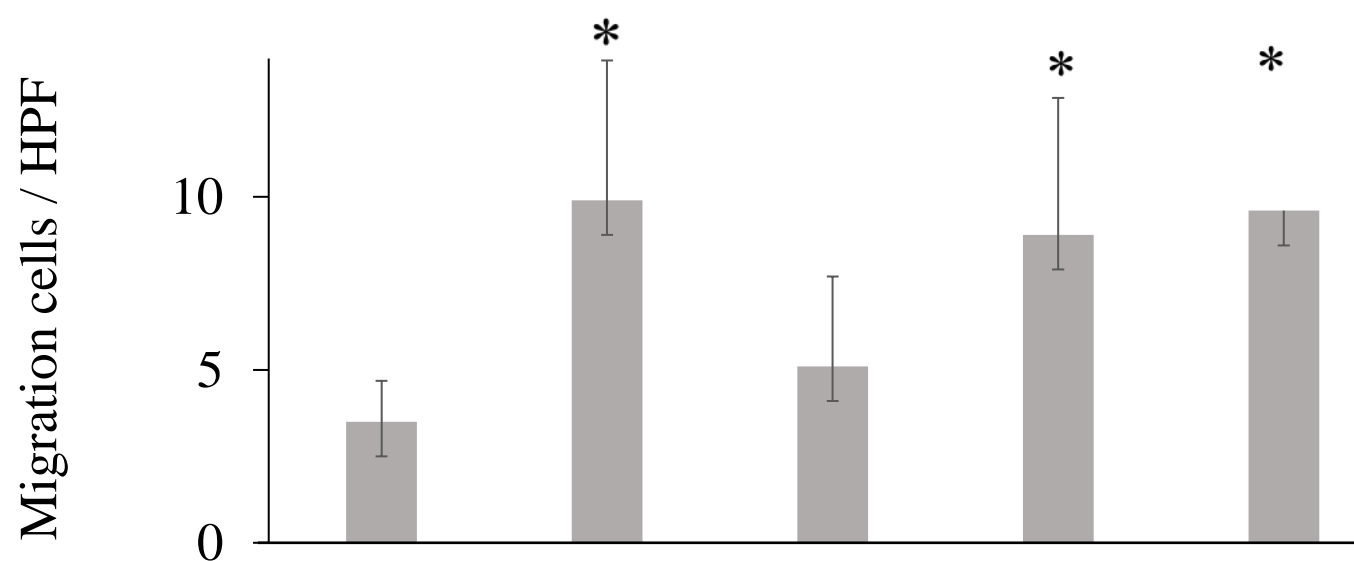

|                          |   |   |   |   |   |
|--------------------------|---|---|---|---|---|
| RPMI                     | + | + | + | + | + |
| Nimesulide (100 $\mu$ M) | - | - | - | - | + |
| rMCP-1 (1ng/ml)          | - | + | + | + | + |
| MCP-1Ab (100ng/ml)       | - | - | + | - | - |
| IgG control (100ng/ml)   | - | - | - | + | - |
