# Supplementary figures and images for: Depletion of tumor‐associated macrophages inhibits lung cancer growth and enhances the antitumor effect of cisplatin
Source: PubMed Central journal article supplement — Cancer Sci. 2022 Dec 28;114(3):750–63. doi: 10.1111/cas.15671 (PMC9986097; doi:10.1111/cas.15671), 2022-12-28

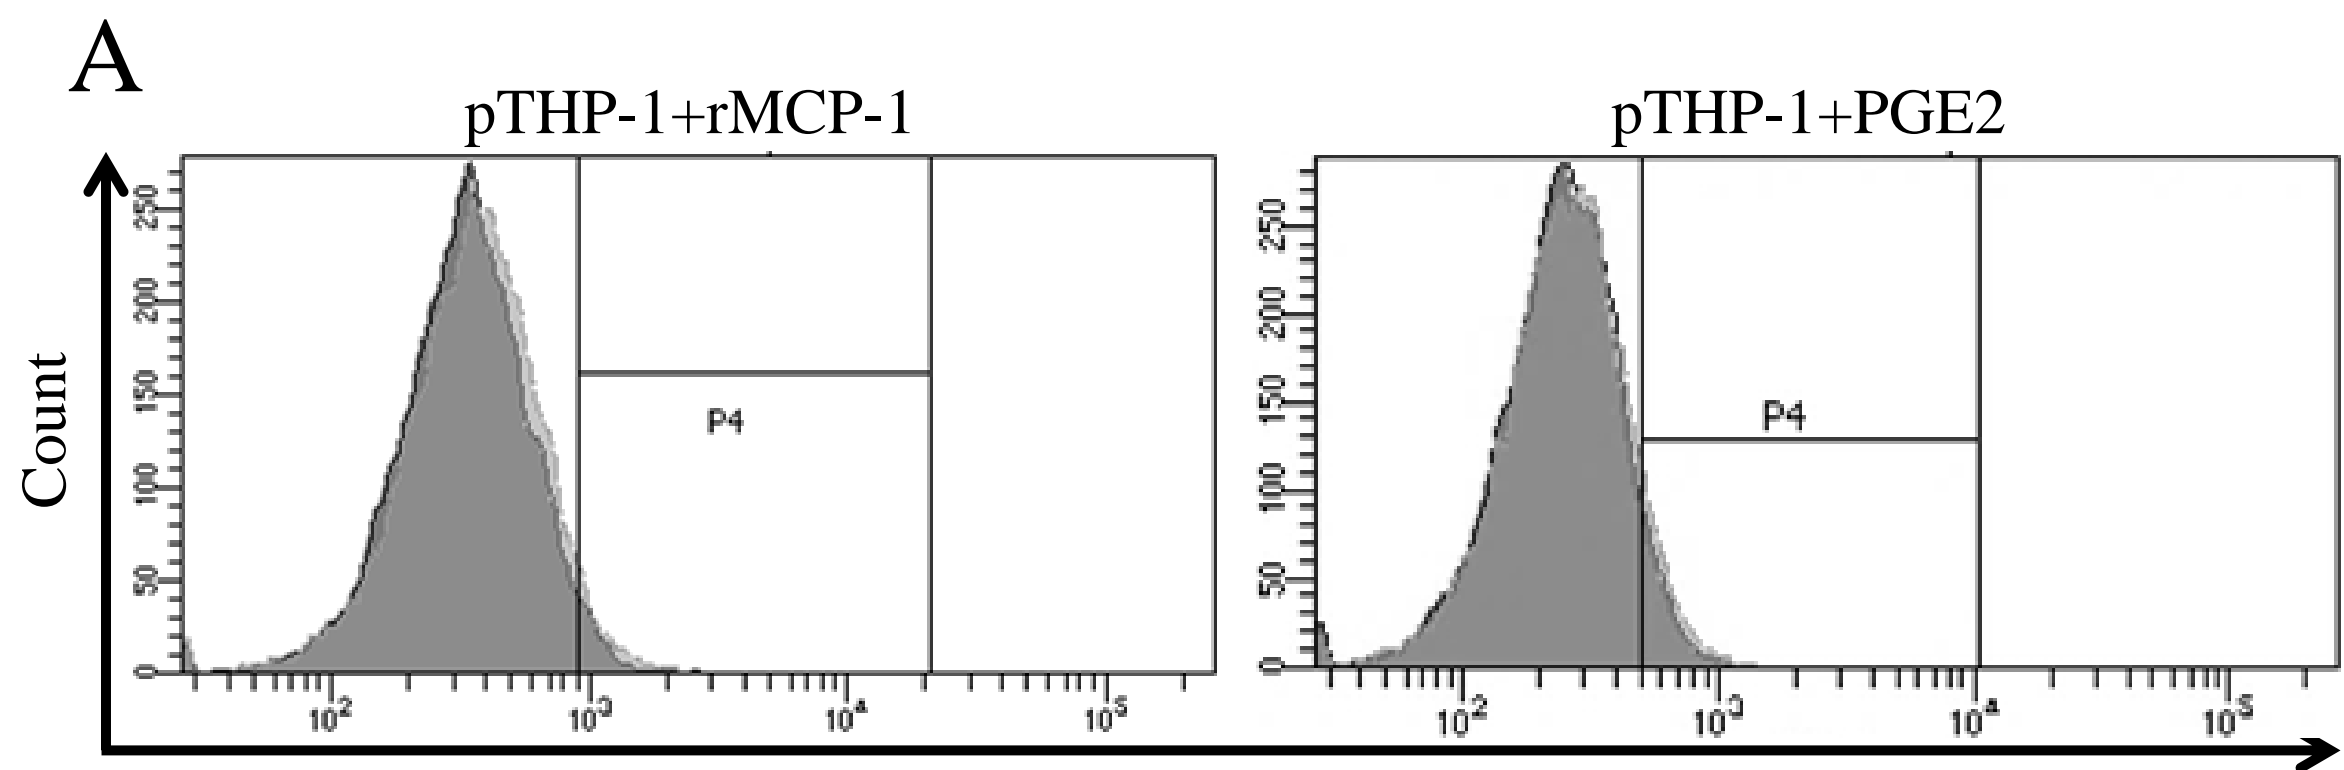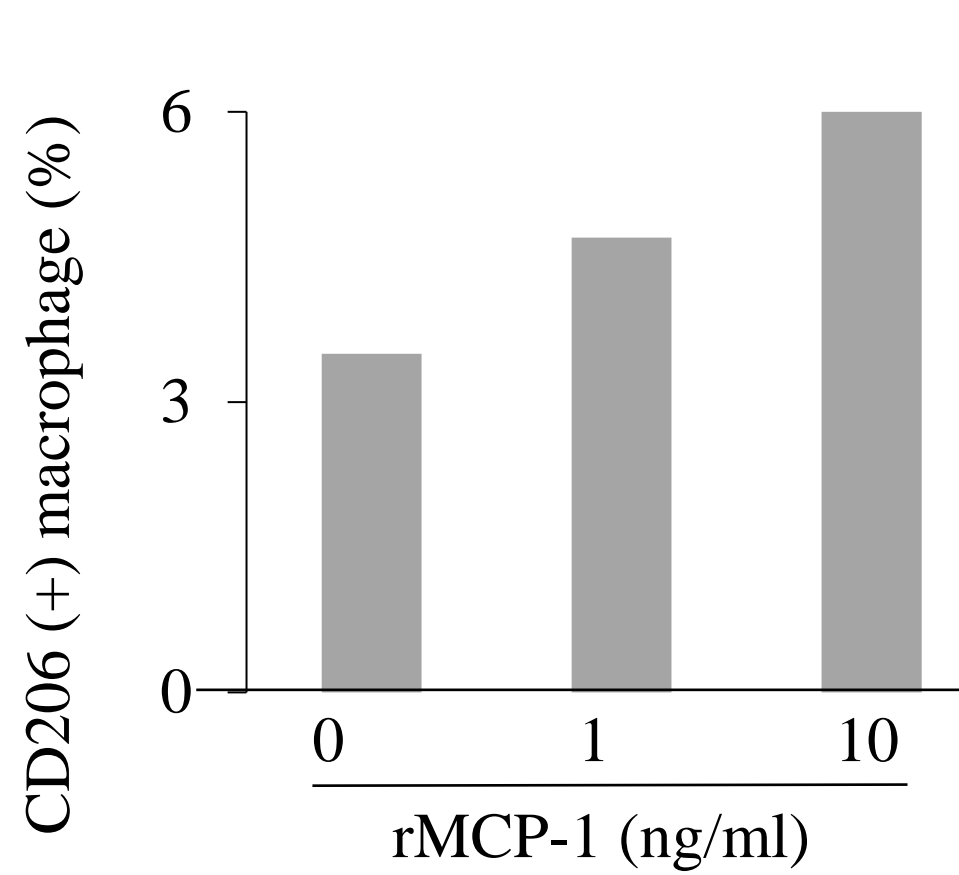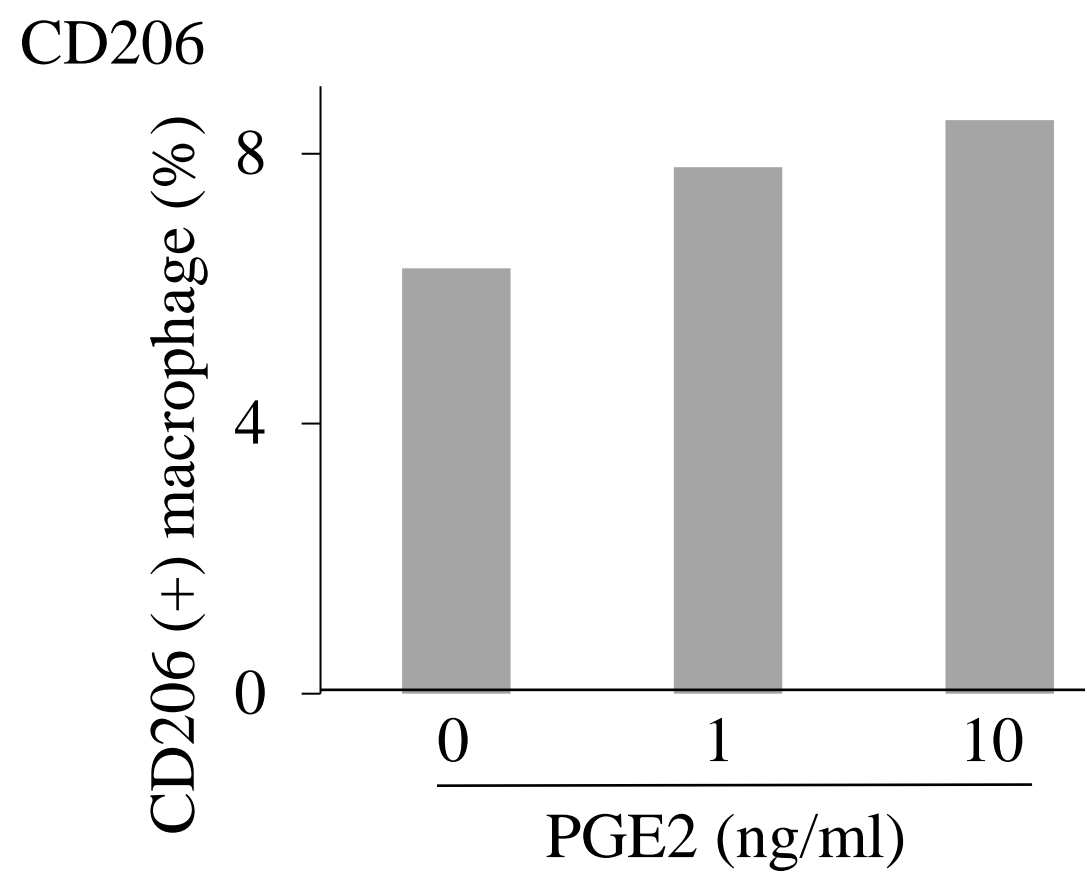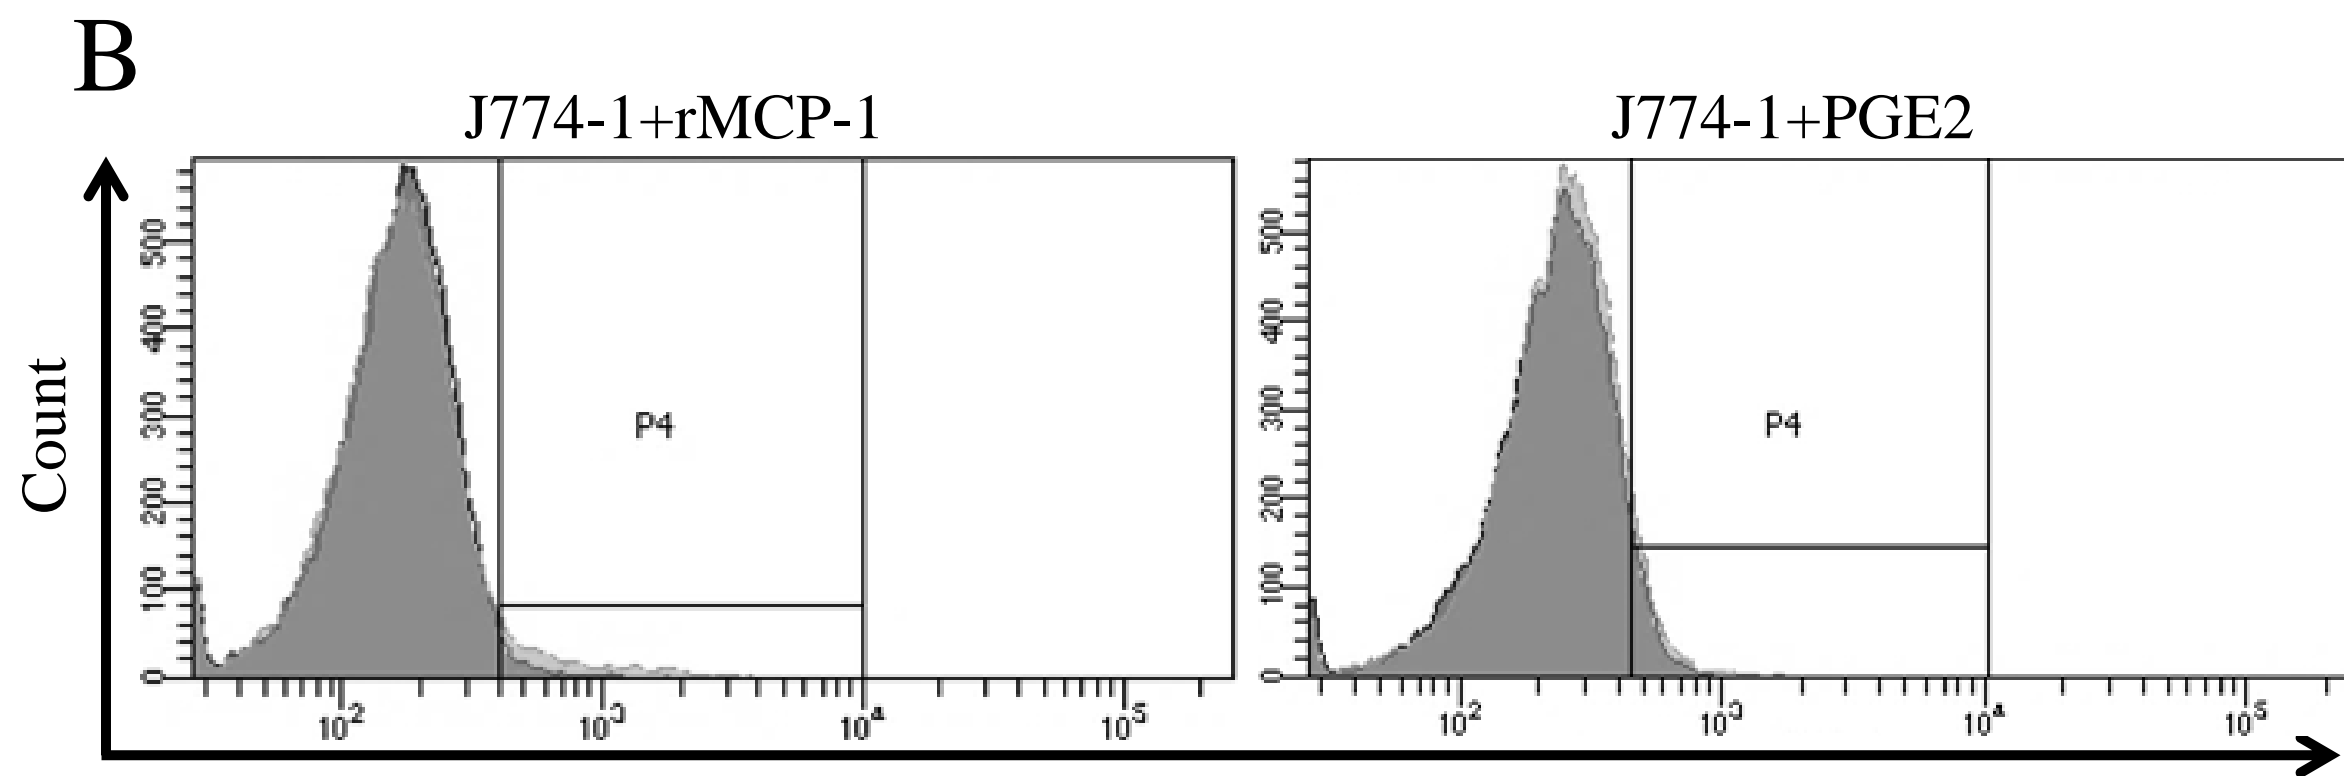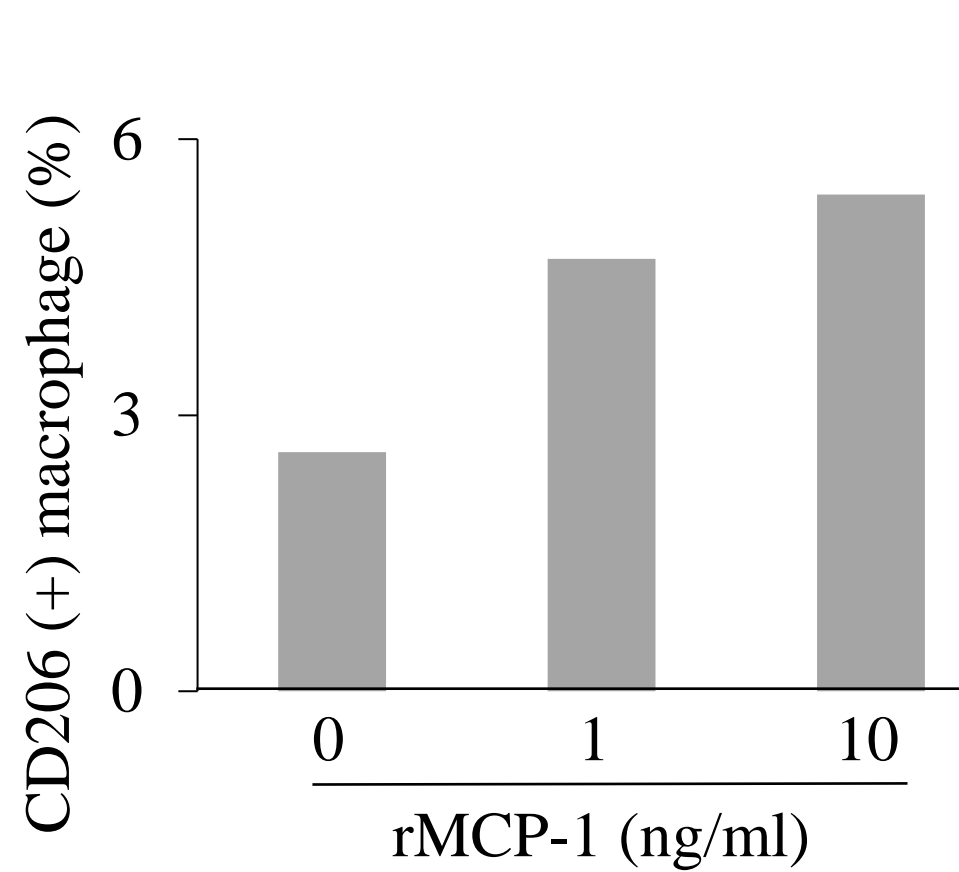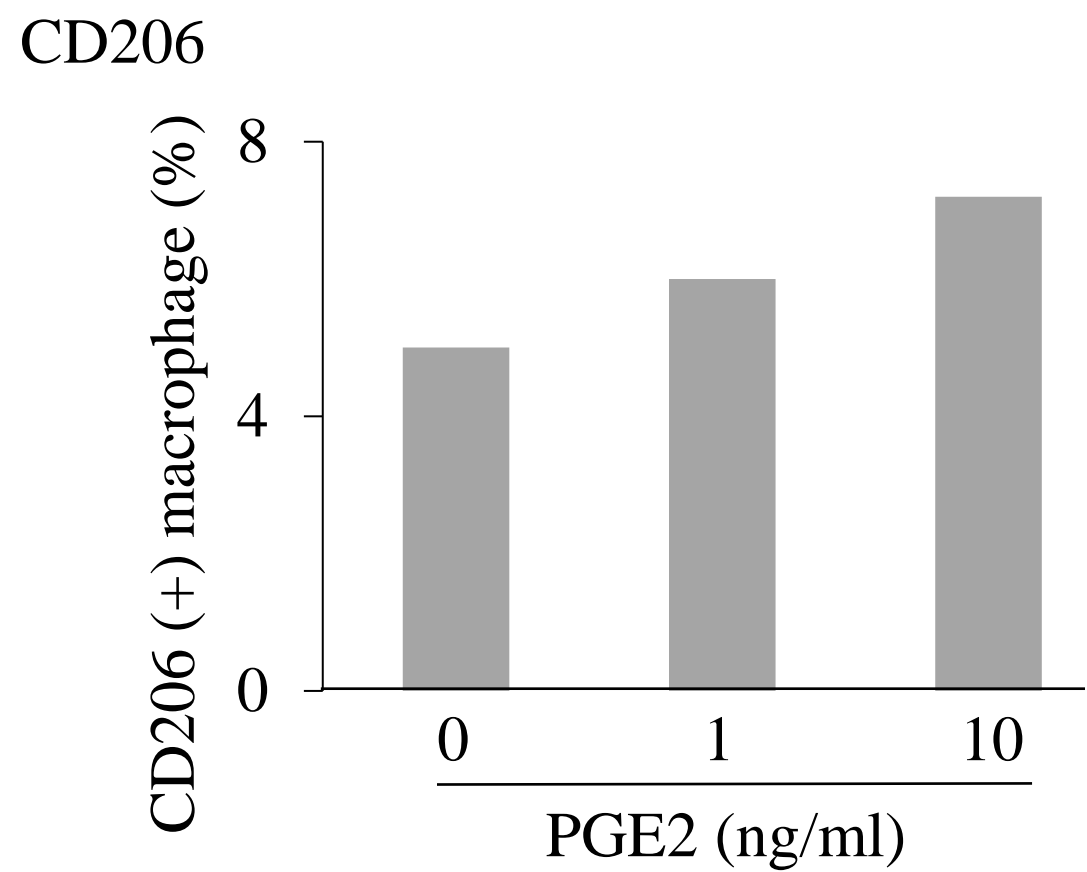

Supplement: CAS-114-750-s002.pdf [file CAS-114-750-s002.pdf]

**A549**

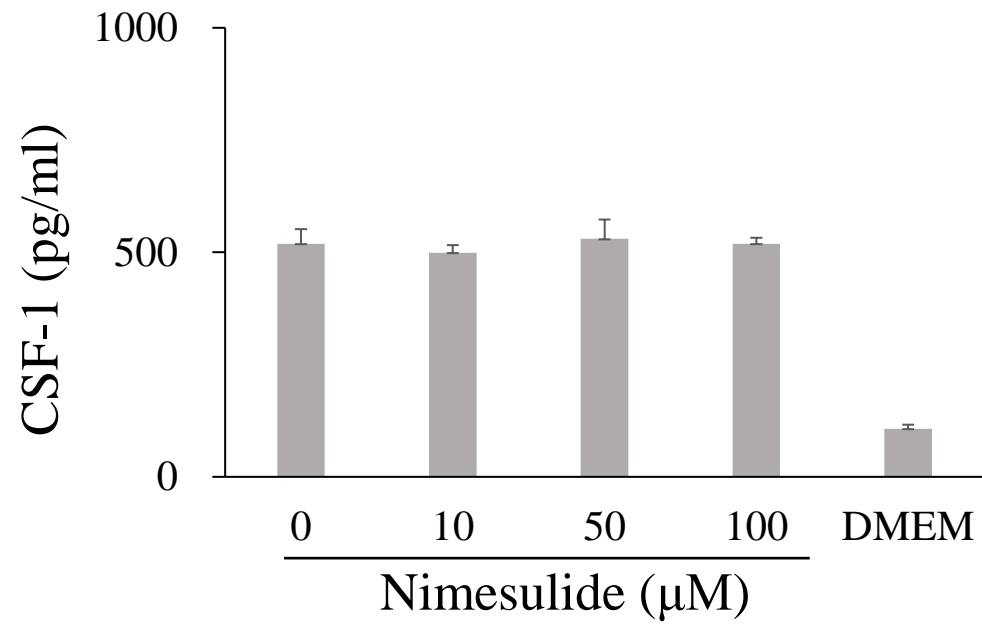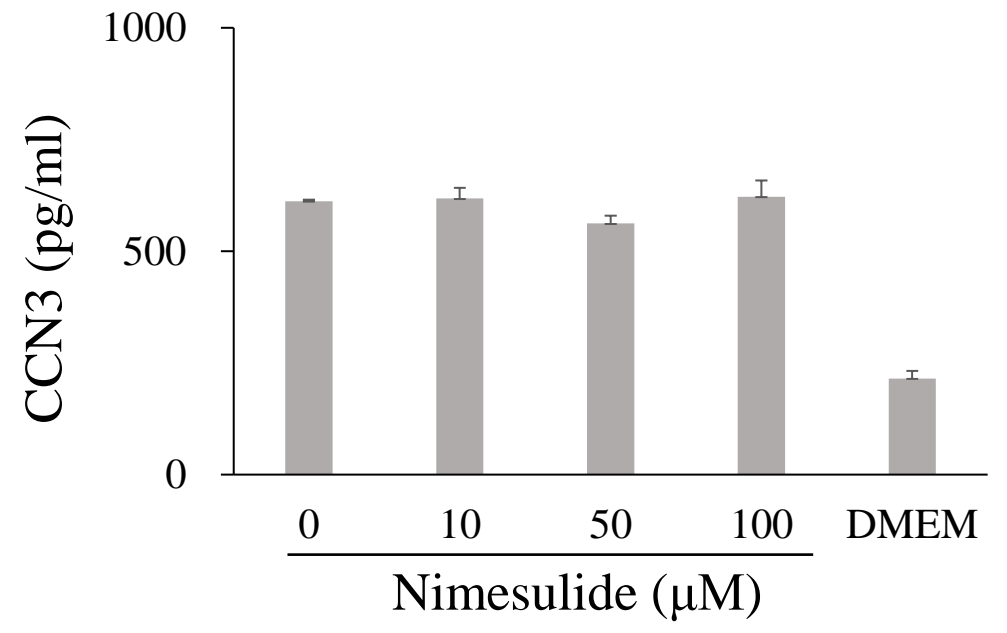

**RERF-LC-MS**

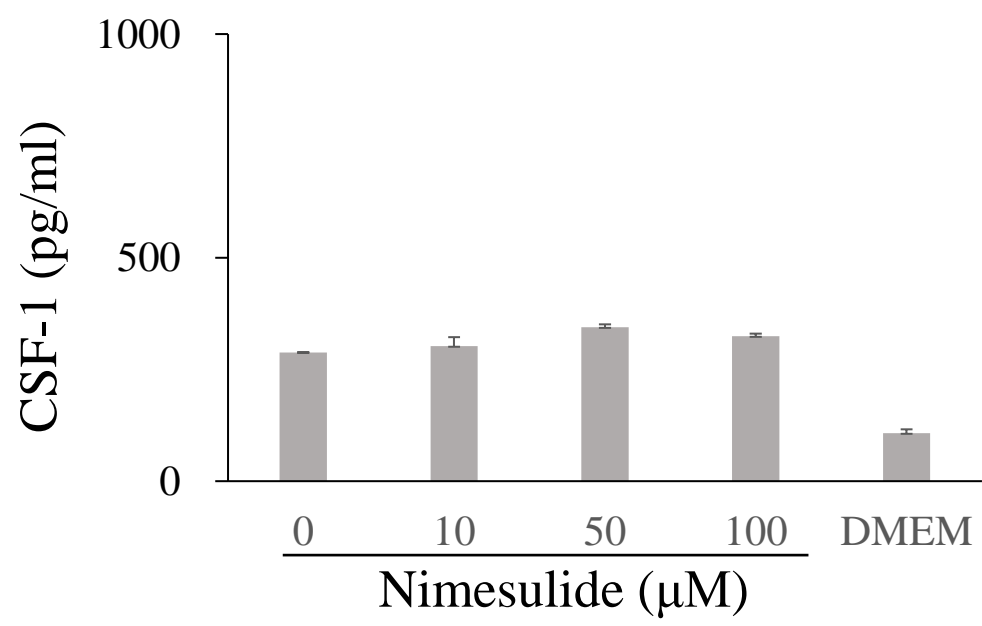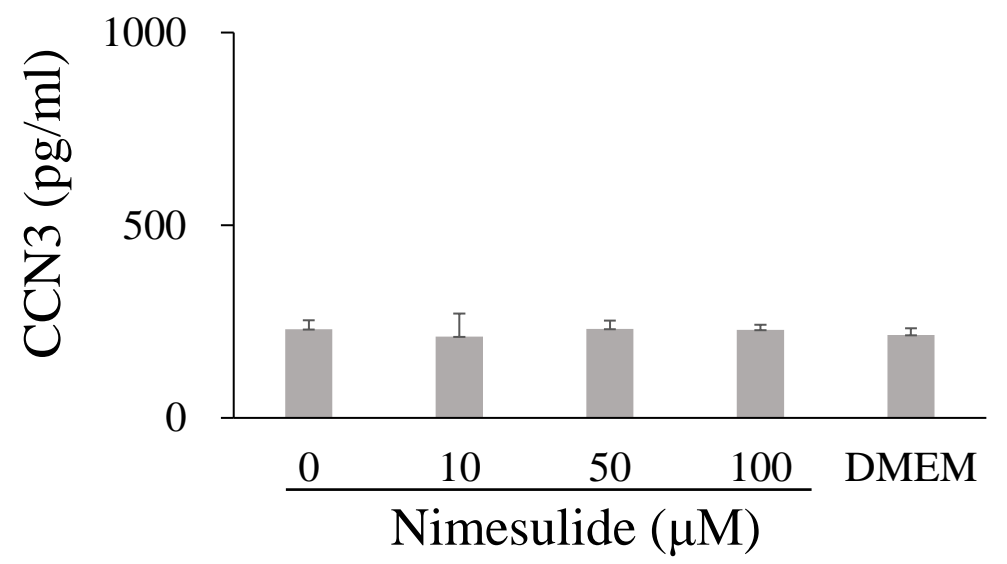

Supplement: CAS-114-750-s003.pdf [file CAS-114-750-s003.pdf]

**A****THP-1 Migration assay**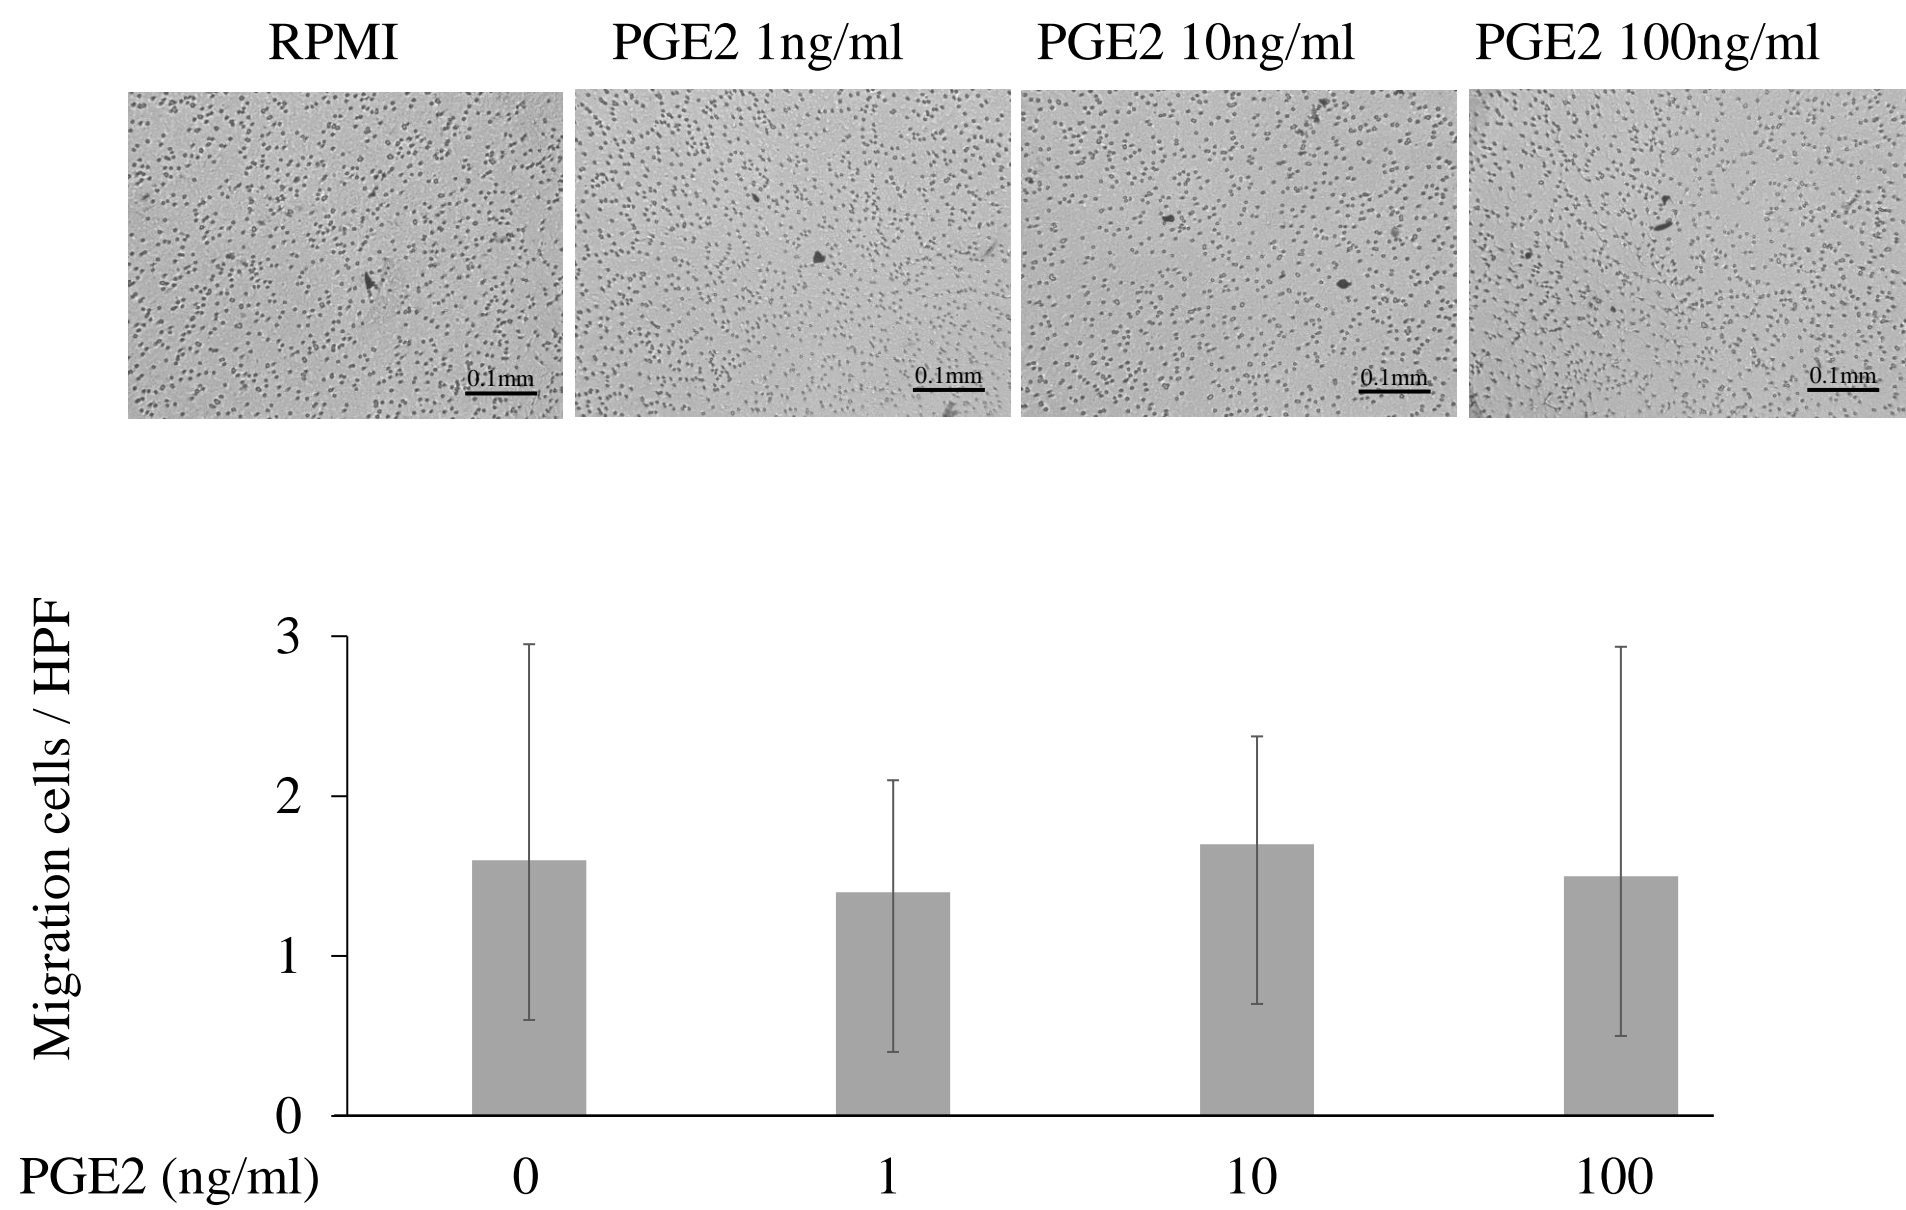**B****J774-1 Migration assay**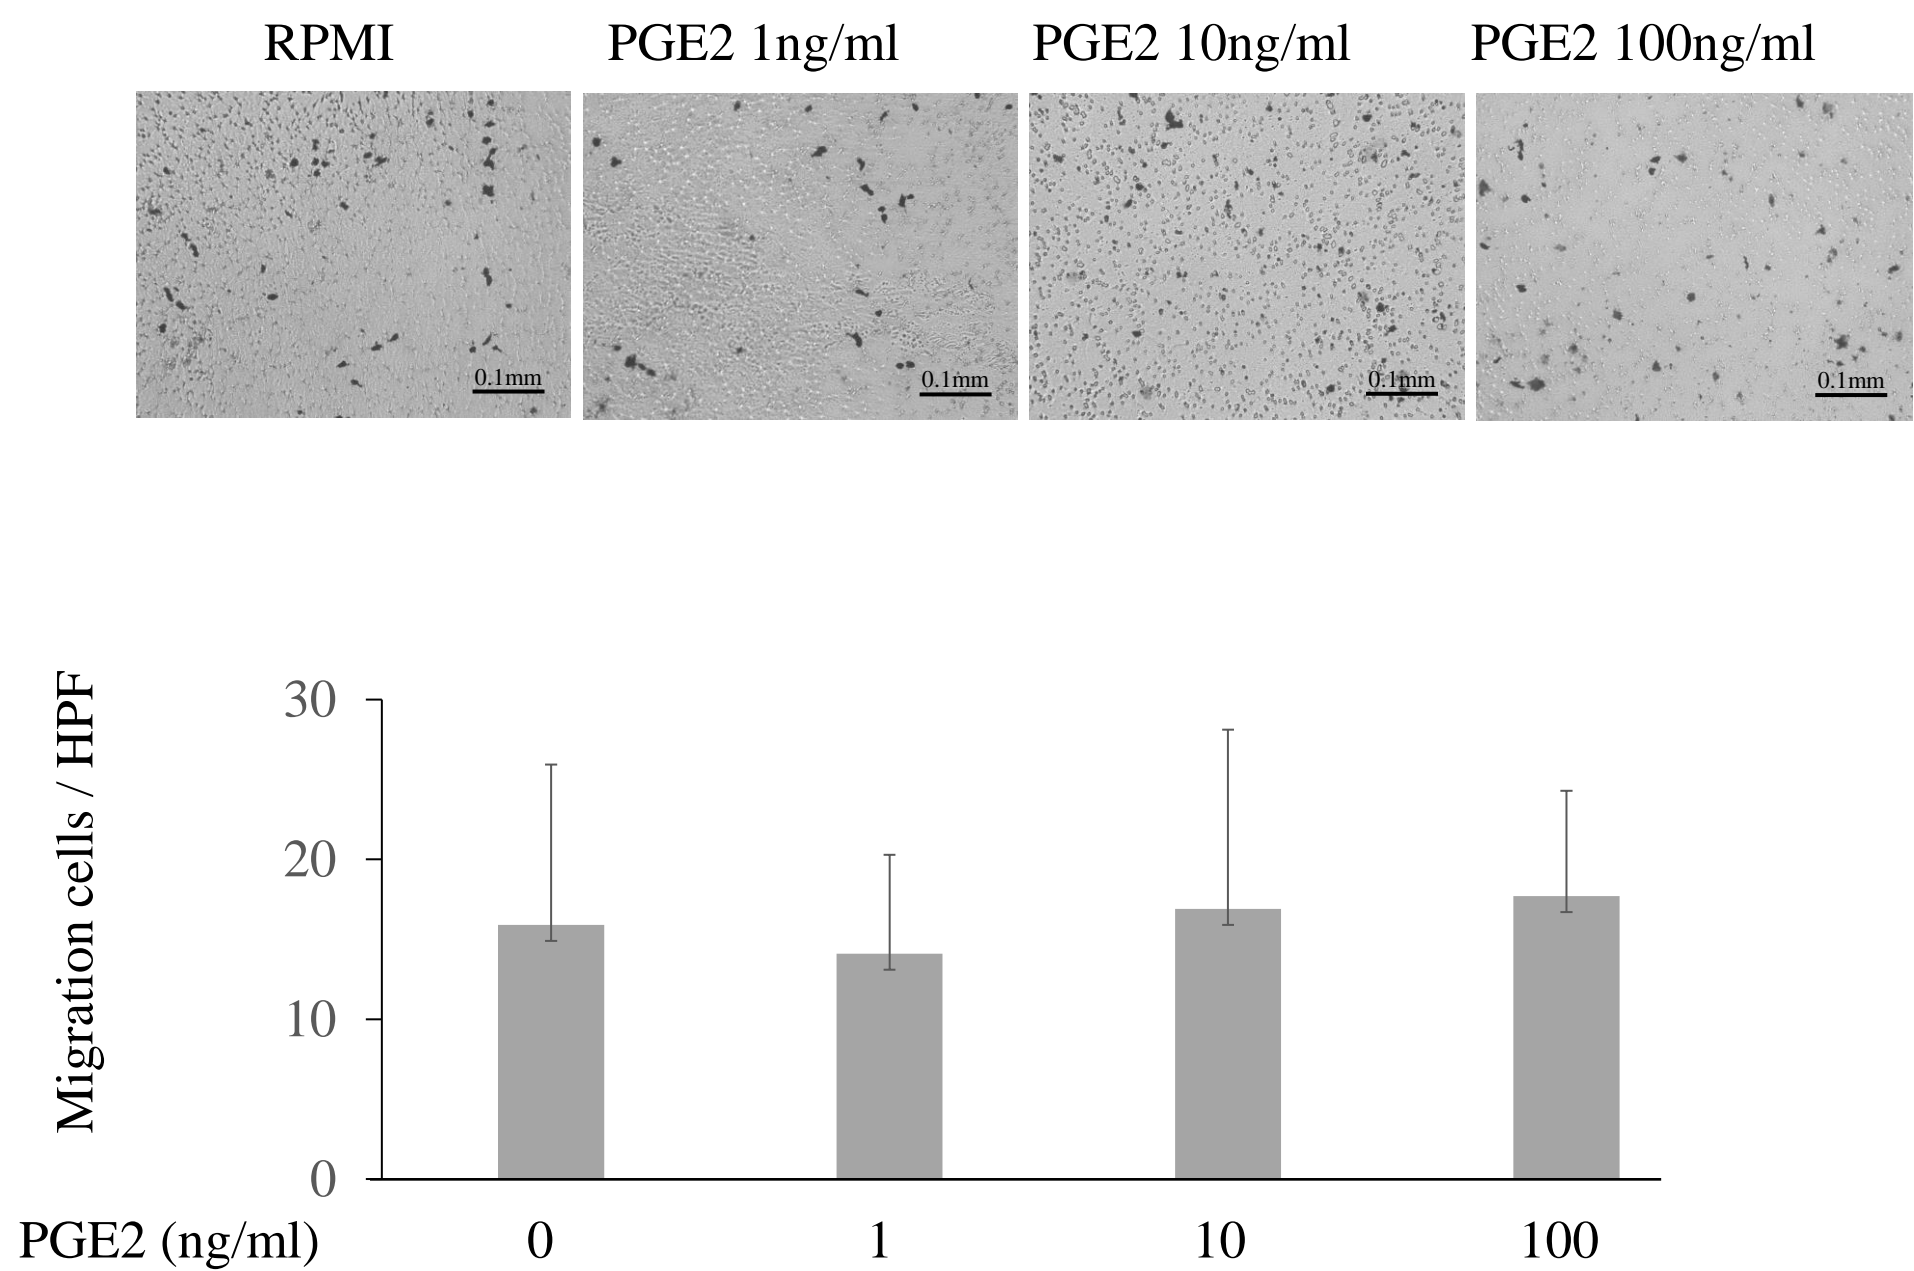

Supplement: CAS-114-750-s004.pdf [file CAS-114-750-s004.pdf]
